# Supplementary material for: The biomarkers of key miRNAs and target genes associated with acute myocardial infarction
Source: PeerJ. 2020 May 13;8:e9129. doi: 10.7717/peerj.9129 (PMC7229769; doi:10.7717/peerj.9129)
Supplement: Supplemental Information 1 [file peerj-08-9129-s001.xlsx]

## Sheet: Figure 6
		Fig. 6A				Fig. 6B				Fig. 6C
	Expression level of miR-24-1* in H9C2				Expression level of miR-33a in H9C2				Expression level of miR-34a in H9C2
		Relative Quantity	Relative Quantity SEM			Relative Quantity	Relative Quantity SEM			Relative Quantity	Relative Quantity SEM
	con	1	0.156		con	1	0.0125		con	1	0.1288
	DOX	0.511	0.0555		DOX	0.441	0.0806		DOX	11.687	0.8648
		Fig. 6D				Fig. 6E				Fig. 6F
	Expression level of miR-101 in H9C2				Expression level of miR-139-3p in H9C2				Expression level of miR-142-3p in H9C2
		Relative Quantity	Relative Quantity SEM			Relative Quantity	Relative Quantity SEM			Relative Quantity	Relative Quantity SEM
	con	1	0.0491		con	1	0.0111		con	1	0.0491
	DOX	9.019	0.986		DOX	0.168	0.0633		DOX	0.548	0.0484
		Fig. 6G				Fig. 6H
	Expression level of miR-545 in H9C2				Expression level of miR-598 in H9C2
		Relative Quantity	Relative Quantity SEM			Relative Quantity	Relative Quantity SEM
	con	1	0.0111		con	1	0.0989
	DOX	0.168	0.0633		DOX	4.688	0.5431

## Sheet: Figure 7
		Fig. 7A				Fig. 7B				Fig. 7C
	Expression level of miR-24-1* in blood samples				Expression level of miR-33a in blood samples				Expression level of miR-34a in blood samples
		Relative Quantity	Relative Quantity SEM			Relative Quantity	Relative Quantity SEM			Relative Quantity	Relative Quantity SEM
	con 1	1	0.422885		con 1	1	0.214576		con 1	1	0.111458
	con 2	23.236	3.87844		con 2	0.037	0.0161181		con 2	13.089	4.2682
	con 3	28.684	3.34624		con 3	0.112	0.0191037		con 3	1.097	0.0882823
	con 4	45.228	12.5017		con 4	2.031	0.32146		con 4	4.735	0.788024
	con 5	10.043	2.4848		con 5	2.183	0.269925		con 5	0.946	0.167485
	con 6	24.466	2.23553		con 6	0.414	0.0910915		con 6	0.503	0.0508215
	con 7	18.022	3.1038		con 7	0.0189	0.00177667		con 7	15.335	1.92594
	con 8	40.714	7.08599		con 8	0.578	0.0592953		con 8	42.602	10.0635
	con 9	28.796	2.19503		con 9	0.377	0.0257172		con 9	12.921	0.465403
	con 10	10.64	1.44906		con 10	0.348	0.0377209		con 10	2.813	0.101633
	con 11	46.282	9.84698		con 11	1.793	0.563455		con 11	9.056	0.124524
	AMI 1	0.0345	0.00619716		AMI 1	1.287	0.0761682		AMI 1	15.549	0.937384
	AMI 2	0.748	0.0781166		AMI 2	0.257	0.143914		AMI 2	31.778	8.59087
	AMI 3	0.165	0.0132816		AMI 3	0.023	0.00290956		AMI 3	3.399	0.356084
	AMI 4	3.41	0.682588		AMI 4	0.012	0.00426445		AMI 4	3.386	0.500586
	AMI 5	0.138	0.0267302		AMI 5	0.082	0.037378		AMI 5	5.144	1.06133
	AMI 6	0.014	0.00304855		AMI 6	0.722	0.193294		AMI 6	5.696	3.05441
	AMI 7	2.982	0.62151		AMI 7	0.114	0.0183811		AMI 7	18.241	2.18602
	AMI 8	0.315	0.0180215		AMI 8	0.136	0.00998291		AMI 8	56.818	1.28346
	AMI 9	0.042	0.00671591		AMI 9	0.593	0.786147		AMI 9	9.948	3.35844
	AMI 10	2.074	0.146892		AMI 10	0.004	0.000433089		AMI 10	17.815	3.43228
	AMI 11	4.651	1.09653		AMI 11	0.149	0.0505396		AMI 11	145.621	50.1588
		Fig. 7D				Fig. 7E				Fig. 7F
	Expression level of miR-101 in blood samples				Expression level of miR-139-3p in blood samples				Expression level of miR-142-3p in blood samples
		Relative Quantity	Relative Quantity SEM			Relative Quantity	Relative Quantity SEM			Relative Quantity	Relative Quantity SEM
	con 1	1	0.0562565		con 1	1	0.13726		con 1	1	0.0927218
	con 2	5.671	1.29125		con 2	99.8247	28.3798		con 2	0.063455	0.00940239
	con 3	5.389	0.213838		con 3	9.43688	0.446538		con 3	0.559499	0.0902715
	con 4	0.996	0.0544403		con 4	14.9428	5.3849		con 4	0.501871	0.110173
	con 5	45.912	3.13031		con 5	2.99555	0.377094		con 5	0.462804	0.0104934
	con 6	0.968	0.102174		con 6	198.662	54.3453		con 6	0.0251639	0.00513911
	con 7	2.097	0.386524		con 7	0.281943	0.0291578		con 7	0.0215695	0.0021816
	con 8	0.383	0.0222482		con 8	223.337	23.1105		con 8	0.671271	0.076232
	con 9	1.441	0.170458		con 9	18.045	2.21077		con 9	0.210504	0.0199498
	con 10	2.033	0.0144342		con 10	15.0685	0.728361		con 10	1.16403	0.231863
	con 11	0.878	0.0604604		con 11	67.3851	7.50828		con 11	0.0750044	0.001731
	AMI 1	1.722	0.146582		AMI 1	0.695933	0.292137		AMI 1	0.00983201	0.00202709
	AMI 2	10.934	2.12666		AMI 2	20.5287	3.61898		AMI 2	0.0827554	0.0224798
	AMI 3	30.667	2.11538		AMI 3	1.13118	0.120401		AMI 3	0.00458827	0.00119486
	AMI 4	7.132	0.566816		AMI 4	0.219158	0.0228326		AMI 4	0.187538	0.0480285
	AMI 5	122.315	25.0007		AMI 5	1.73083	0.538228		AMI 5	0.0608316	0.0134589
	AMI 6	7.342	2.33218		AMI 6	2.00198	0.69699		AMI 6	0.537458	0.0795138
	AMI 7	1.761	0.553271		AMI 7	1.25833	0.462729		AMI 7	0.0686371	0.00255438
	AMI 8	31.659	2.25488		AMI 8	20.3674	3.72302		AMI 8	0.541935	0.11174
	AMI 9	18.898	4.48837		AMI 9	8.78362	1.12234		AMI 9	0.0894966	0.00787553
	AMI 10	0.9556	0.0414122		AMI 10	0.62216	0.153122		AMI 10	0.312319	0.0425394
	AMI 11	50.253	17.4221		AMI 11	5.78497	2.53065		AMI 11	1.4889	0.53263
		Fig. 7G				Fig. 7H
	Expression level of miR-545 in blood samples				Expression level of miR-598 in blood samples
		Relative Quantity	Relative Quantity SEM			Relative Quantity	Relative Quantity SEM
	con 1	1	0.262937		con 1	1.00848	0.129535
	con 2	3.73949	1.41448		con 2	0.365571	0.143425
	con 3	7.32828	1.20102		con 3	0.909931	0.146226
	con 4	4.31908	0.679321		con 4	1.31693	0.456916
	con 5	0.635926	0.0578806		con 5	0.152345	0.0242414
	con 6	3.26825	0.490063		con 6	0.0260083	0.00400994
	con 7	1.10286	0.272313		con 7	1.45113	0.229501
	con 8	0.109993	0.00857064		con 8	0.161071	0.0366378
	con 9	4.49219	0.803469		con 9	0.173035	0.00745894
	con 10	8.59208	1.45354		con 10	0.700216	0.145055
	con 11	0.211694	0.032117		con 11	0.0470048	0.00941564
	AMI 1	0.147962	0.0127499		AMI 1	0.00260389	0.000275618
	AMI 2	0.0108046	0.00310414		AMI 2	0.0492797	0.0146183
	AMI 3	0.611709	0.0813596		AMI 3	0.0060425	0.000865503
	AMI 4	0.561999	0.0759754		AMI 4	0.0265461	0.00595981
	AMI 5	0.357891	0.102542		AMI 5	0.774311	0.267855
	AMI 6	0.0313679	0.0112573		AMI 6	0.00356532	0.00134312
	AMI 7	0.112953	0.0384742		AMI 7	0.0529806	0.00562418
	AMI 8	0.800105	0.0425932		AMI 8	0.0291855	0.00149446
	AMI 9	0.0273449	0.00324304		AMI 9	0.0288064	0.007188
	AMI 10	0.00864274	0.00149186		AMI 10	0.00151472	0.000332568
	AMI 11	0.0729176	0.0190259		AMI 11	0.129089	0.0613444
